# Supplementary material for: NINJ1 plays a vital role in the release of neutrophil extracellular traps in acute lung injury
Source: Research Square preprint supplement (doi:10.21203/rs.3.rs-8426344/v1), 2026-01-13
Supplement: Supplementary file 1 [file 48bf989dad07e82ebf279f02.pdf]

# NINJ1 plays a vital role in the release of neutrophil extracellular traps in acute lung injury

Wen-Jing Zhong<sup>1,2,3</sup>, Yu-Biao Liu<sup>2,3,4</sup>, Xin-Yu Yang<sup>2,3,4</sup>, Meng-Rui Chen<sup>2,3,4</sup>, Nan-Shi-Yu Yang<sup>2,3,4</sup>, Chen-Yu Zhang<sup>2,3,4</sup>, Jian-Bing Xiong<sup>5,6</sup>, Wei-Feng Tang<sup>7</sup>, Cha-Xiang Guan<sup>2,3,8</sup>, Yan-Feng Zhang<sup>1,6</sup>, Jia-Xi Duan<sup>\*1,6</sup>, Yong Zhou<sup>\*2,3,4</sup>

<sup>1</sup> Department of Geriatric Respiratory and Critical Care Medicine, Xiangya Hospital, Central South University, Changsha, Hunan 410008, China;

<sup>2</sup> Department of Physiology, Xiangya School of Basic Medical Science, Central South University, Changsha, Hunan 410078, China;

<sup>3</sup> National Experimental Teaching Demonstration Center for Medical Function, Changsha, Hunan 410078, China;

<sup>4</sup> Key Laboratory of General University of Hunan Province, Basic and Clinical Research in Major Respiratory Disease, Changsha, Hunan 410078, China;

<sup>5</sup> Department of Emergency, Xiangya Hospital, Central South University, Changsha, Hunan 410078, China;

<sup>6</sup> National Clinical Research Center of Geriatric Disorders, Xiangya Hospital, Central South University, Changsha, Hunan 410008, China;

<sup>7</sup> Department of Pulmonary and Critical Care Medicine, The Second Xiangya Hospital, Central South University, Changsha, Hunan 410011, China;

<sup>8</sup> School of Basic Medicine, Ningxia Medical University, Yinchuan, Ningxia 750004, China;

Keywords: Ninjurin-1, acute lung injury, neutrophils, neutrophil extracellular traps

## **\*To whom correspondence should be addressed:**

Prof. Yong Zhou

Department of Physiology

Xiangya School of Basic Medical Science, Central South University

Changsha, Hunan 410078, China

Tel.: +86-731-88660446

E-mail: zhouyong421@csu.edu.cn

or

Dr. Jia-Xi Duan

Department of Geriatric Respiratory and Critical Care Medicine, Xiangya Hospital, Central South University

Changsha, Hunan 410008, China

E-mail: duanjiaxi91@csu.edu.cn

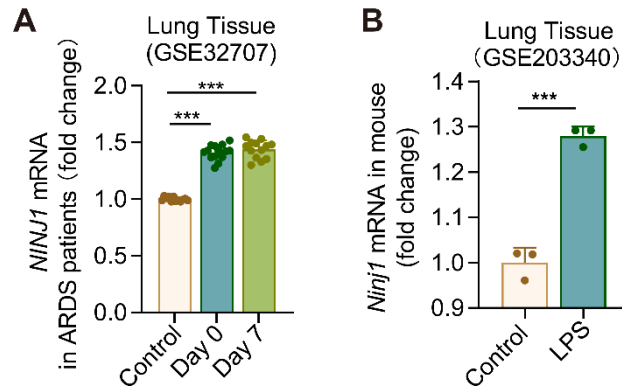

**Figure S1. NINJ1 expression is significantly increased in ALI/ARDS.**

A) Human *NINJ1* mRNA expression in the lungs from ARDS patients was determined by microarray (GSE32707) ( $n=14$ ). Blood samples were collected from enrolled ARDS patients at the time of hospital admission (Day 0) and on Day 7 thereafter. B) *Ninj1* mRNA expression in the lungs from LPS-induced ALI mice (GSE203340) ( $n=3$ ). \*\*\* $P < 0.001$ .

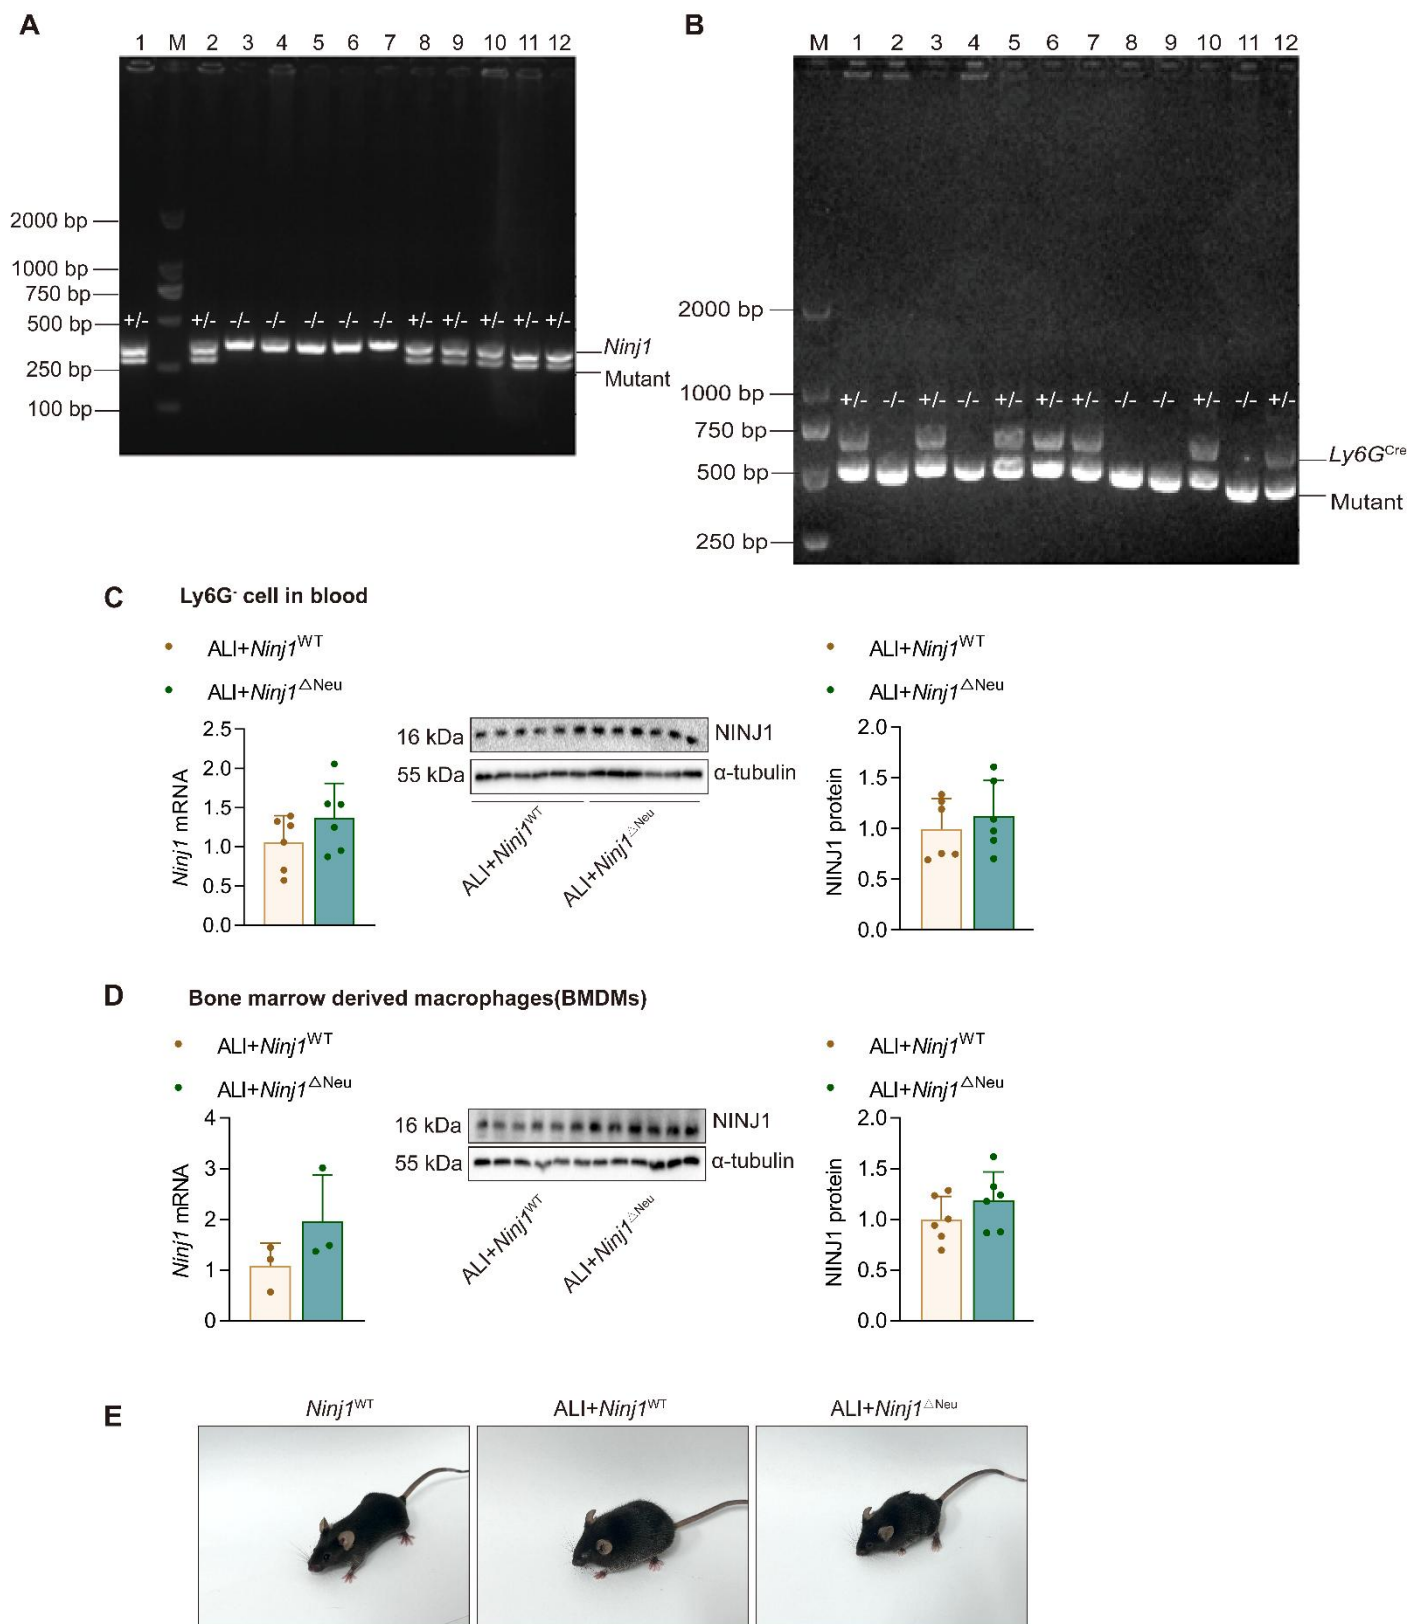

**Figure S2. Generation of neutrophil-specific conditional *Ninj1*-null mice.**

A) Targeted disruption of the *Ninj1* gene was verified by PCR of genomic DNA isolated from candidate mice. B) Targeted disruption of the *Ly6G<sup>Cre</sup>* gene was verified by PCR of genomic DNA isolated from candidate mice. *Ninj1<sup>WT</sup>* and *Ninj1<sup>ΔNeu</sup>* mice were intratracheally administered with LPS (5 mg/kg). C) Real-time PCR and Western blot were employed to detect NINJ1 expression in Ly6G<sup>+</sup> cells isolated from bone marrow from *Ninj1<sup>WT</sup>* and *Ninj1<sup>ΔNeu</sup>* mice. D) Detection of NINJ1 expression by Real-time PCR and Western blot in BMDMs from *Ninj1<sup>WT</sup>* and *Ninj1<sup>ΔNeu</sup>* mice. E) The physical appearance of *Ninj1<sup>WT</sup>* and *Ninj1<sup>ΔNeu</sup>* mice

50 administered with LPS.  $n = 6$  mice/group,  $*P < 0.05$ ,  $**P < 0.01$ , and  $***P < 0.001$ .

51

52

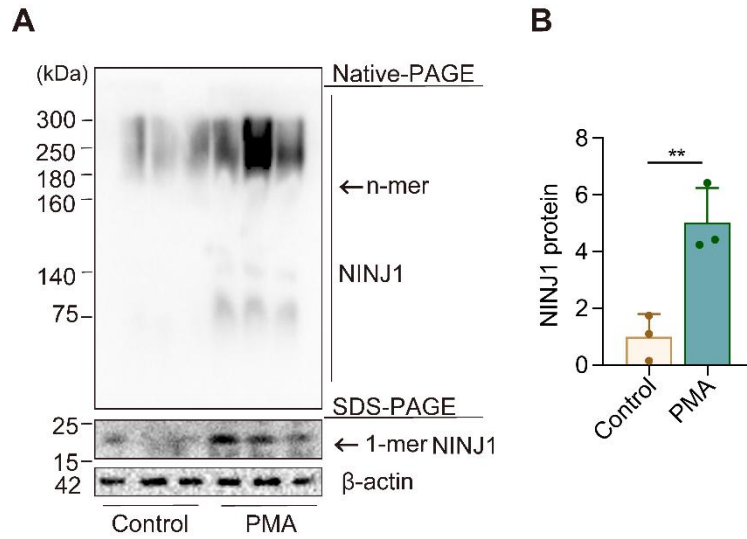

**Figure S3. NINJ1 oligomerization is elevated in PMA-induced neutrophils.**

Bone marrow neutrophils in mice were treated with PMA (10 nM) for 4 h. A) Native-PAGE analysis of NINJ1 oligomerization in PMA-treated neutrophils. SDS-PAGE analysis of NINJ1 monomer and  $\beta$ -actin was used as the internal control. B) Quantification of NINJ1 monomer protein levels,  $n=3$ ,  $**P < 0.01$ .

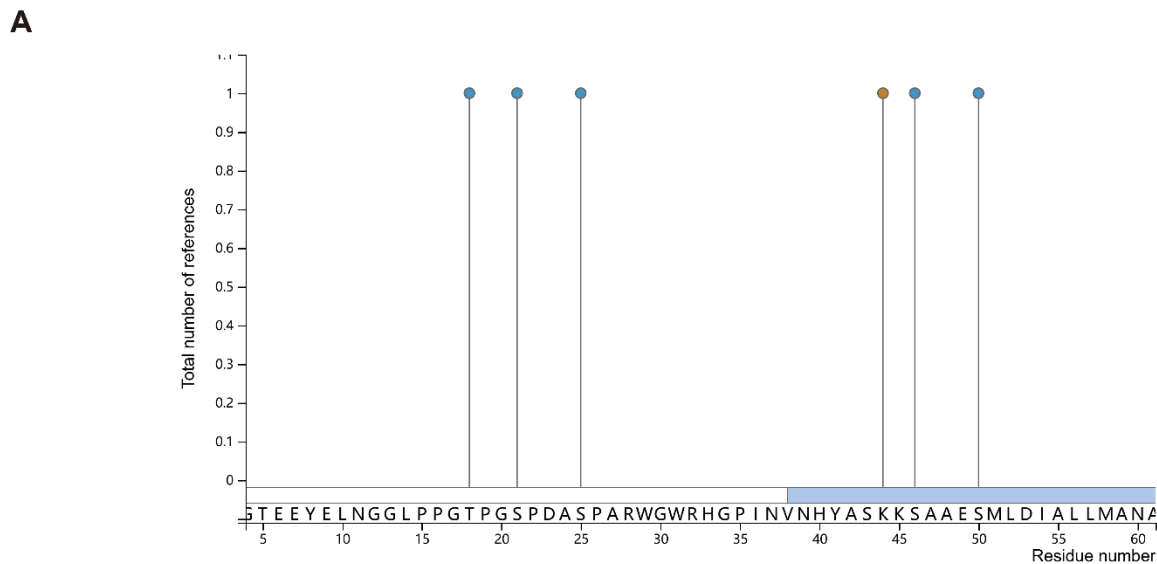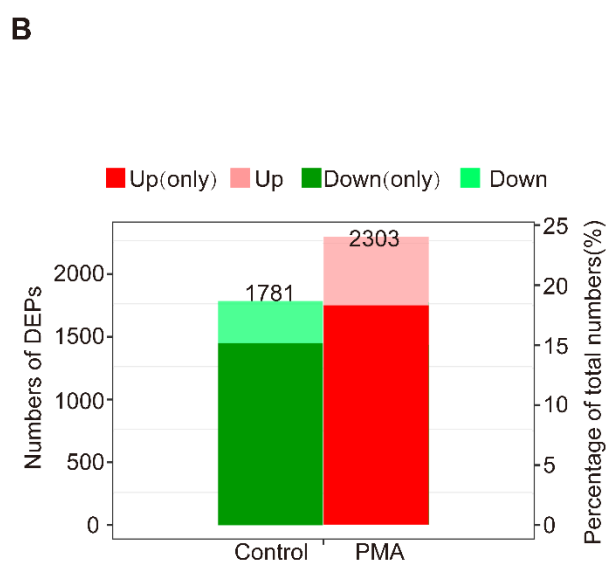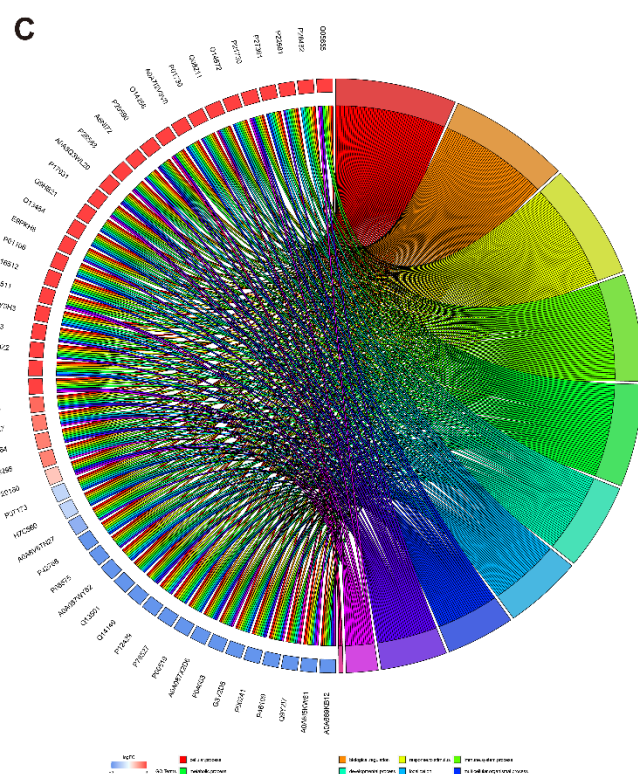

**Figure S4. Lack of upregulated NINJ1 phosphorylation upon PMA stimulation.**

A) To predict potential phosphorylation sites, Bioinformatic analysis with CSSPalm suggested that NINJ1 contains several putative phosphorylation sites, notably at Thr18, Ser25, Ser46, and Ser50. B) Phosphoproteomic profiling of PMA-treated neutrophils identified 2303 upregulated phosphoproteins, none of which corresponded to NINJ1. C) Phosphoproteomic profiling of PMA-treated neutrophils did not detect any upregulated phosphorylation at the predicted sites on NINJ1.  $n = 3$ .
